# Supplementary material for: The time‐of‐day of myocardial infarction onset affects healing through oscillations in cardiac neutrophil recruitment
Source: PubMed Central journal article supplement (PMC4967945; doi:10.15252/emmm.201506083), 2016-05-25
Supplement: EMMM-8-937-s001.pdf [file EMMM-8-937-s001.pdf]

## Appendix

### The time of day of ischemia onset affects myocardial infarction healing and heart function through oscillations in neutrophil mobilization

Maximilian J. Schloss, cand. med.; Michael Horckmans, PhD; Katrin Nitz, MSc; Johan Duchene, PhD; ; Maik Drechsler, PhD<sup>1,3</sup>; Kiril Bidzhekov, PhD<sup>1</sup>; Christoph Scheiermann, PhD; Christian Weber, MD; Oliver Soehnlein, MD, PhD; Sabine Steffens, PhD

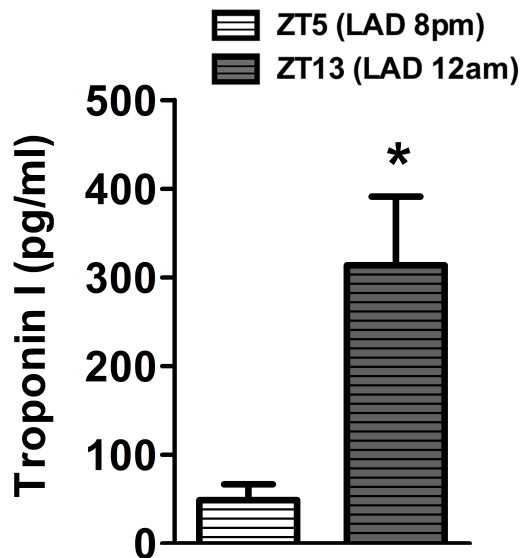

**Appendix Figure S1: ZT13 MI leads to significantly increased cardiac damage compared to ZT5 MI in mice entrained to a shifted light cycle.** Plasma troponin I levels 24 hours after MI. Student's t-test;  $N = 5$  for ZT5 MI and  $n = 6$  for ZT13 MI; \* $P=0,0144$ .

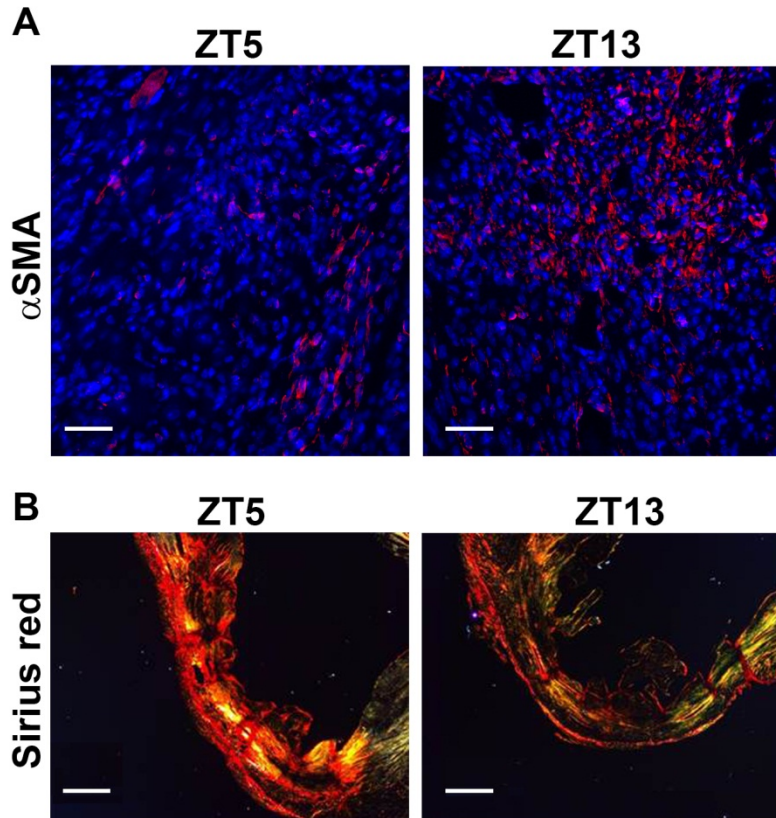

**Appendix Figure S2: Histological analysis of myofibroblasts and collagen.** MI was induced at ZT5 and ZT13 and hearts were harvested 7 days after ligation of LAD. **A**, Representative picture of myofibroblast staining within the infarct area using anti- alpha smooth muscle actin (SMA, positive red fluorescence) and 4',6-Diamidin-2-phenylindol (DAPI) staining of nuclei (blue fluorescence); 20x magnification; Scale bar 50 $\mu$ m. **B**, Representative Image of Sirius-Red staining identifying collagen type I fibers as red fibers within the infarct area; 2.5x magnification; Scale bar 400 $\mu$ m.

## CXCR2 Knock out strategy

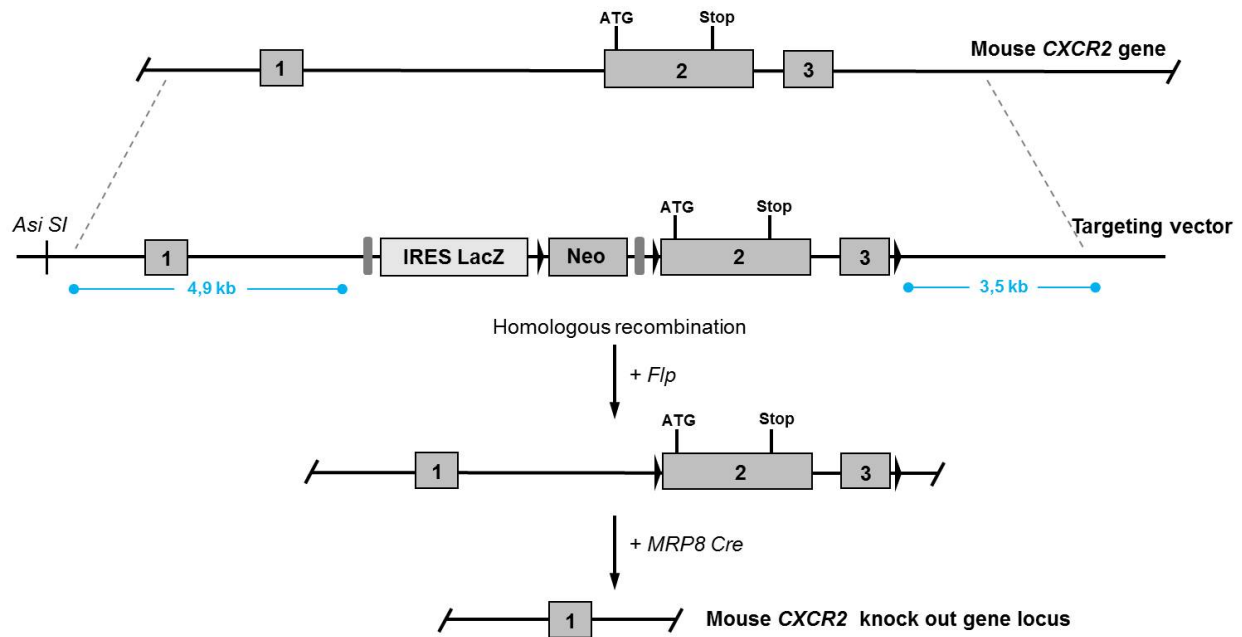

**Appendix Figure S3: Generation of CXCR2-MRP8 Cre knockout mice.** Schematic diagram of the generation of CXCR2 knockout mice. The exon-intron structure of the mouse CXCR2 locus is shown at the top. The targeting vector has a 4.9 kb 5' arm including exon 1 and intron 1-2, the IRES-LacZ coding sequence, and a Neo selection cassette, both flanked by FRT sites (gray bars). The loxP sites (black triangles) flanking exons 2-3 (the coding part of CXCR2 gene) and the Neo gene. The 3' recombination arm spanned 3.5 kb from the gDNA.

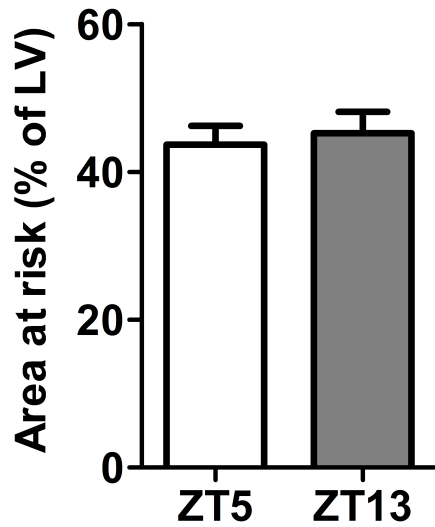

**Appendix Figure S4: The area at risk is independent of the time of day of LAD ligation.** Evan's blue was injected into the left ventricle to distinguish between perfused cardiac tissue stained blue and non-perfused area at risk 24h after MI. The area at risk was calculated as the percentage relative to the left ventricle.  $N = 4$  per group.

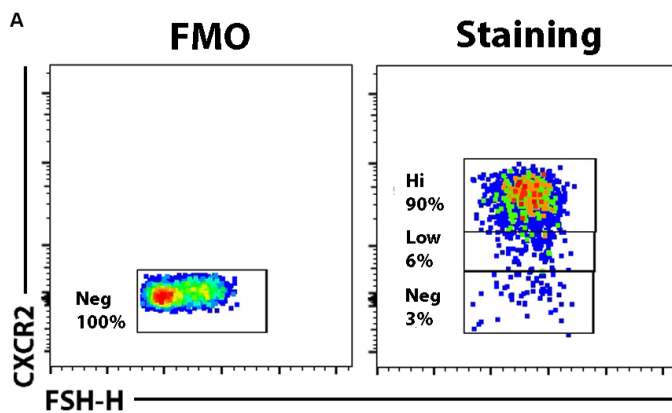

**Appendix Figure S5: Gating strategy for CXCR2+ neutrophils in blood.** The representative dot plots shows the gating strategy for CXCR2 expression on blood neutrophils (identified as CD45+Ly6G+CD11b+) at baseline (ZT5) gated as CXCR2<sup>high</sup>, CXCR2<sup>low</sup> and CXCR2<sup>neg</sup> neutrophils.
